# Supplementary material for: Design and synthesis of a turn-off fluorescent sensor based on a multifunctional Zn(ii) coordination polymer for the detection of Fe3+, Hg2+ and 4-nitrophenol
Source: Royal Society of Chemistry journal article supplement (doi:10.1039/d3ce01174g), 2024-01-01
Supplement: d3ce01174g1.pdf [file d3ce01174g1.pdf]

## Supporting Information

### **Designed synthesis of a turn-off fluorescence sensor based on a multifunctional Zn(II) coordination polymer for detection of Fe<sup>3+</sup>, Hg<sup>2+</sup> and 4-nitrophenol**

Bo Zhao,<sup>a</sup> Jiangfeng Lu,<sup>a</sup> Hao Liu<sup>a</sup>, Senlin Li,<sup>a</sup> Qiaozhen Sun,<sup>a,\*</sup> Bingguang Zhang<sup>b,\*</sup>

*<sup>a</sup>School of Materials Science and Engineering, Central South University, Changsha, 410083, China*

*Email: [rosesunqz@csu.edu.cn](mailto:rosesunqz@csu.edu.cn)*

*<sup>b</sup>Key Laboratory of Catalysis and Materials Sciences of the State Ethnic Affairs Commission & Ministry of Education, College of Chemistry and Material Science, South-Central Minzu University, Wuhan, 430074, China*

*Email: [zhangbg68@yahoo.com](mailto:zhangbg68@yahoo.com)*

\*These authors contributed equally to this work.

## Contents

|                                                                     |     |
|---------------------------------------------------------------------|-----|
| Section 1 Synthesis of H <sub>2</sub> L.....                        | S3  |
| Section 2 General characterizations and structural information..... | S6  |
| Section 3 Detection of Fe <sup>3+</sup> and Hg <sup>2+</sup> .....  | S10 |
| Section 4 Detection of nitro explosives.....                        | S15 |

## Section 1 Synthesis of H<sub>2</sub>L

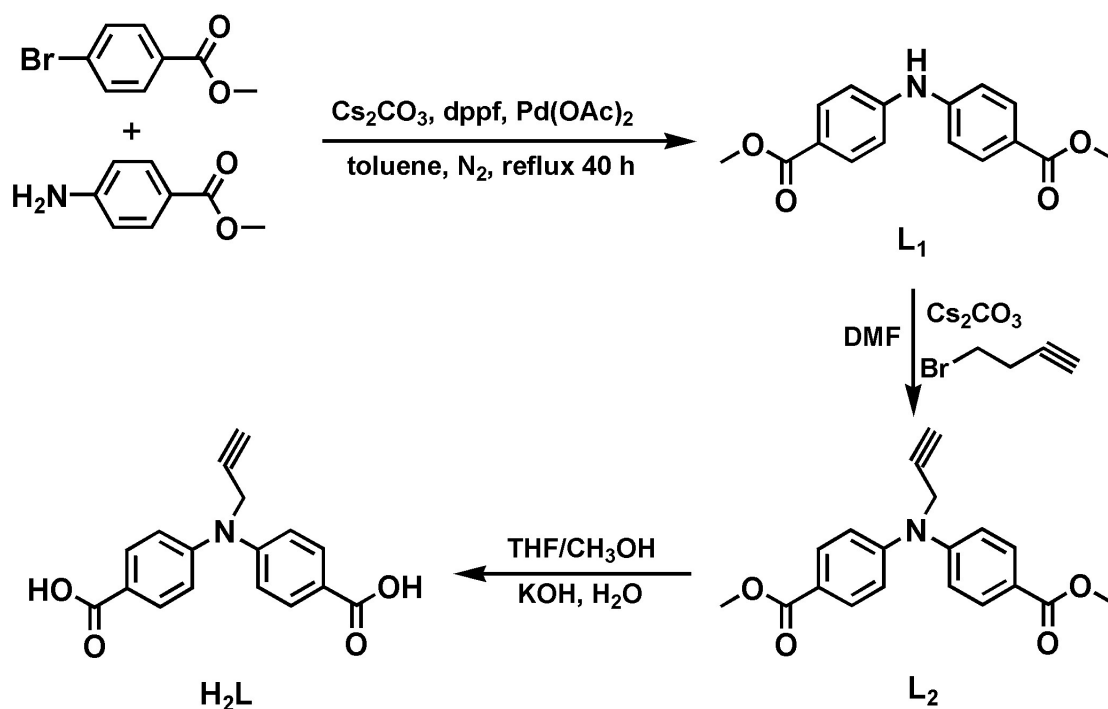

dppf: 1,1'-Bis(diphenylphosphino)ferrocene

Scheme S1. Synthetic route of H<sub>2</sub>L ligand

### Step 1

**Syntheisis of L<sub>1</sub>** (1,1'-Dimethyl 4,4'-iminobis[benzoate]): A mixture of 1-bromo-4-(methoxycarbonyl)benzene (21.5 g, 0.10 mol), (4-(methoxycarbonyl)phenyl)amine (18.1 g, 0.12 mol),  $\text{Cs}_2\text{CO}_3$  (45.6 g, 0.14 mol), 1,1'-bis(diphenylphosphino)ferrocene (2.2 g, 4.0 mmol) and  $\text{Pd}(\text{OAc})_2$  (1.0 g, 4.4 mmol) in 800 mL toluene were refluxed 40 h under  $\text{N}_2$  atmosphere. The solution was filtered and cooled to room temperature. The crystalline powder  $\text{L}_1$  was separated and washed in a yield 17.1 g (~60%). <sup>1</sup>NMR (500 MHz,  $\text{CD}_3\text{SOCD}_3$ )  $\delta$  (ppm): 9.28 (s, 1H), 7.89 (m, 4H), 7.24 (m, 4H), 3.81 (s, 6H).



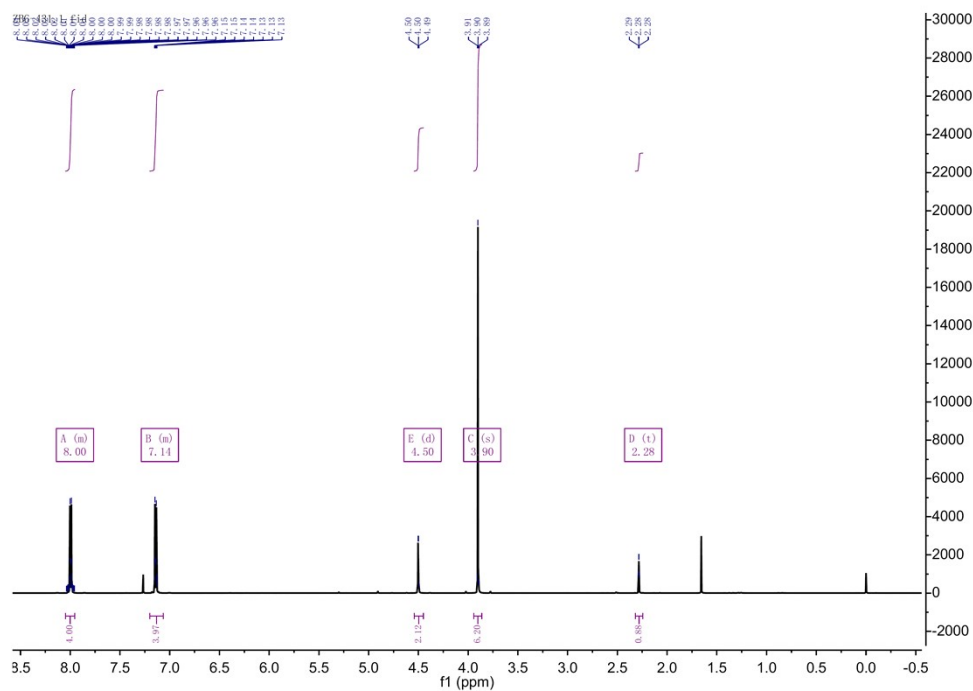

### Step 3

**Synthesis of H<sub>2</sub>L (4,4'-(ethynylimino)bis[benzoic acid]):** L<sub>2</sub> (5.8 g, 18 mmol) was dissolved in 180 mL THF/CH<sub>3</sub>OH mixed solution. Then KOH solution was added and stirred for one night at room temperature. The solution was filtered and the solvent was removed under reduced pressure to afford H<sub>2</sub>L. <sup>1</sup>NMR (500 MHz, CD<sub>3</sub>SOCD<sub>3</sub>) δ (ppm): 12.71 (s, 2H), 7.90 (m, 4H), 7.19 (m, 4H), 4.64 (d, 2H), 3.28 (t, 1H).

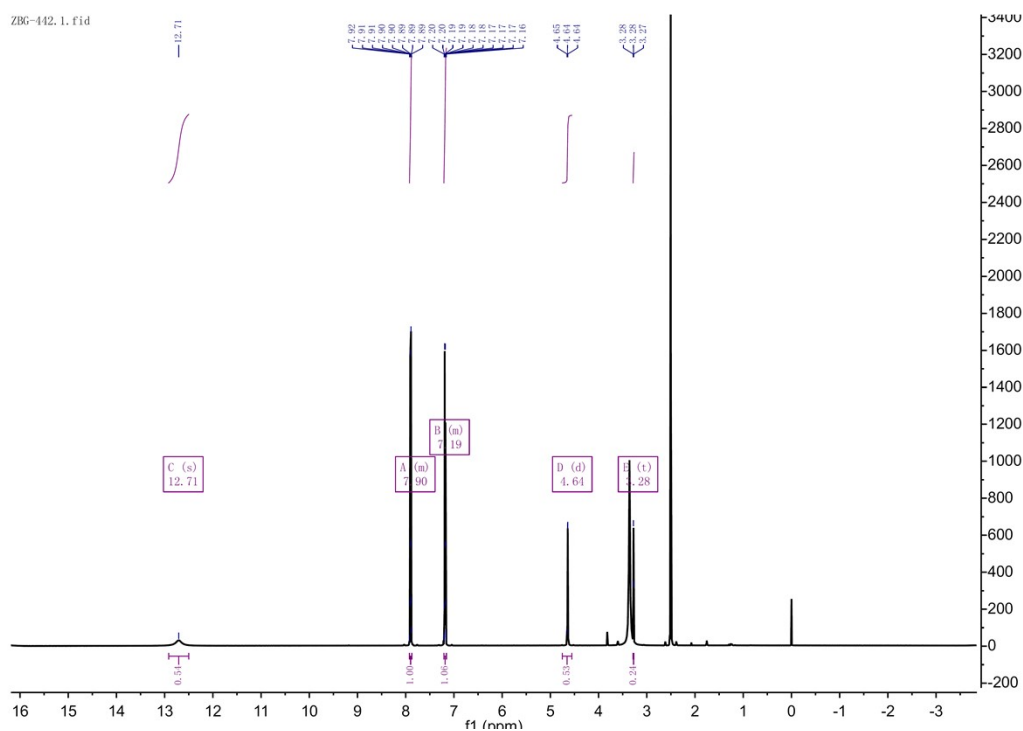

## Section 2 General characterizations and structural information

**Table S1** Selected Bond Lengths (Å) and Bond Angles (°) for **H<sub>2</sub>L** and **1**

| <b>H<sub>2</sub>L</b> |          |                   |          |
|-----------------------|----------|-------------------|----------|
| N(1)-C(10)            | 1.389(3) | N(1)-C(3)         | 1.430(3) |
| N(1)-C(1)             | 1.472(3) | O(1)-C(9)         | 1.225(3) |
| O(2)-C(9)             | 1.308(3) | O(3)-C(16)        | 1.283(4) |
| O(4)-C(16)            | 1.246(4) | C(1)-C(2)         | 1.474(4) |
| C(2)-C(17)            | 1.165(4) | C(3)-C(8)         | 1.375(3) |
| C(3)-C(4)             | 1.391(4) | C(4)-C(5)         | 1.377(4) |
| C(5)-C(6)             | 1.389(3) | C(6)-C(7)         | 1.380(4) |
| C(6)-C(9)             | 1.479(4) | C(7)-C(8)         | 1.376(4) |
| C(10)-C(15)           | 1.395(4) | C(10)-C(11)       | 1.395(4) |
| C(11)-C(12)           | 1.390(4) | C(12)-C(13)       | 1.380(4) |
| C(13)-C(14)           | 1.386(4) | C(13)-C(16)       | 1.491(4) |
| C(14)-C(15)           | 1.370(4) | C(10)-N(1)-C(3)   | 121.1(2) |
| C(10)-N(1)-C(1)       | 121.8(2) | C(3)-N(1)-C(1)    | 116.0(2) |
| N(1)-C(1)-C(2)        | 112.6(2) | C(17)-C(2)-C(1)   | 176.8(3) |
| C(8)-C(3)-C(4)        | 119.6(2) | C(8)-C(3)-N(1)    | 120.4(2) |
| C(4)-C(3)-N(1)        | 120.0(2) | C(5)-C(4)-C(3)    | 120.1(2) |
| C(4)-C(5)-C(6)        | 120.2(3) | C(7)-C(6)-C(5)    | 119.1(2) |
| C(7)-C(6)-C(9)        | 121.8(2) | C(5)-C(6)-C(9)    | 119.1(2) |
| C(8)-C(7)-C(6)        | 120.8(2) | C(3)-C(8)-C(7)    | 120.1(2) |
| O(1)-C(9)-O(2)        | 122.6(2) | O(1)-C(9)-C(6)    | 123.0(2) |
| O(2)-C(9)-C(6)        | 114.4(2) | N(1)-C(10)-C(15)  | 120.9(2) |
| N(1)-C(10)-C(11)      | 121.5(2) | C(15)-C(10)-C(11) | 117.6(3) |
| C(12)-C(11)-C(10)     | 120.2(3) | C(13)-C(12)-C(11) | 121.5(3) |
| C(12)-C(13)-C(14)     | 118.1(3) | C(12)-C(13)-C(16) | 122.5(3) |
| C(14)-C(13)-C(16)     | 119.3(3) | C(15)-C(14)-C(13) | 120.9(3) |
| C(14)-C(15)-C(10)     | 121.6(3) | O(4)-C(16)-O(3)   | 124.1(3) |

|                     |           |                   |            |
|---------------------|-----------|-------------------|------------|
| O(4)-C(16)-C(13)    | 120.3(3)  | O(3)-C(16)-C(13)  | 115.6(3)   |
| <b>1</b>            |           |                   |            |
| Zn(1)-O(4)#1        | 1.938(9)  | Zn(1)-O(1)        | 2.011(3)   |
| Zn(1)-N(4)#2        | 2.073(3)  | Zn(1)-N(2)        | 2.076(3)   |
| Zn(1)-O(2)          | 2.492(3)  | O(4)#1-Zn(1)-O(1) | 125.1(5)   |
| O(4)#1-Zn(1)-N(4)#2 | 107.4(4)  | O(1)-Zn(1)-N(4)#2 | 97.74(11)  |
| O(4)#1-Zn(1)-N(2)   | 125.3(5)  | O(1)-Zn(1)-N(2)   | 100.30(12) |
| N(4)#2-Zn(1)-N(2)   | 93.21(12) | O(4)#1-Zn(1)-O(2) | 93.1(4)    |
| O(1)-Zn(1)-O(2)     | 57.01(9)  | N(4)#2-Zn(1)-O(2) | 154.26(11) |
| N(2)-Zn(1)-O(2)     | 87.32(11) |                   |            |

Symmetry codes: (1) #1: -x+1, y+1, -z+1/2; #2: -x+3/2, y+1/2, -z+3/2.

**Table S2** Hydrogen bond distances (Å) and bond angles (°) for **1** and **2**

| D-H...A               | d(D-H) | d(H...A) | d(D...A) | ∠(DHA) |
|-----------------------|--------|----------|----------|--------|
| <b>H<sub>2</sub>L</b> |        |          |          |        |
| O(2)-H(2A)...O(1)#1   | 0.82   | 1.83     | 2.650(4) | 178    |
| O(3)-H(3A)...O(4)#2   | 0.82   | 1.81     | 2.626(3) | 174    |
| <b>1</b>              |        |          |          |        |
| N(3)-H (3)...O(2)#3   | 0.86   | 1.93     | 2.744(5) | 159    |
| C(24)-H(24) ...O(3)#4 | 0.93   | 2.21     | 3.047(4) | 150    |

Symmetry codes: (1) #1: -x+2, -y-1, -z; #2: -x, -y+2, -z+1; #3: -x+3/2, -y+3/2, -z+1; #4: x+1/2, y+1/2, z+1.

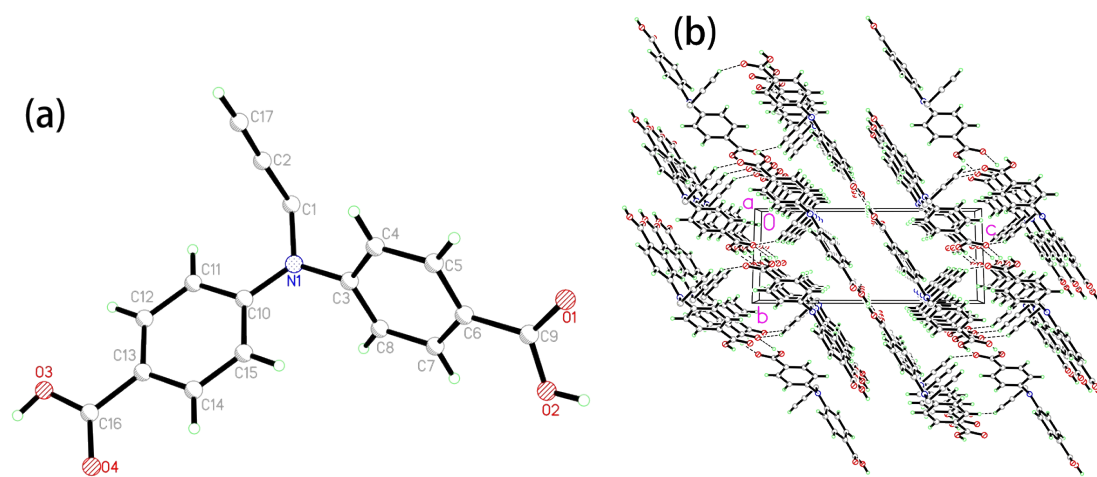

**Fig. S1** The unit structure (a) and the packing diagram (b) of  $H_2L$ . The hydrogen bonds are shown in dashed lines.

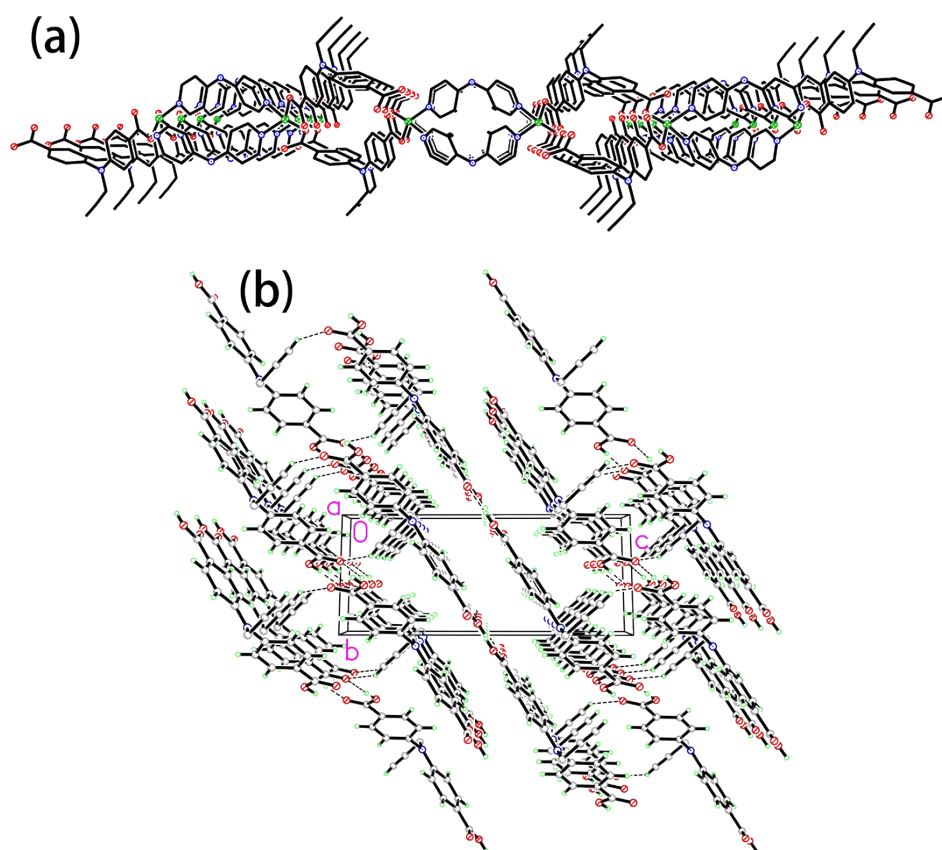

**Fig. S2** (a) The 2D layer along  $b$  axis; (b) The packing diagram of **1**. The hydrogen bonds are shown in dashed lines.

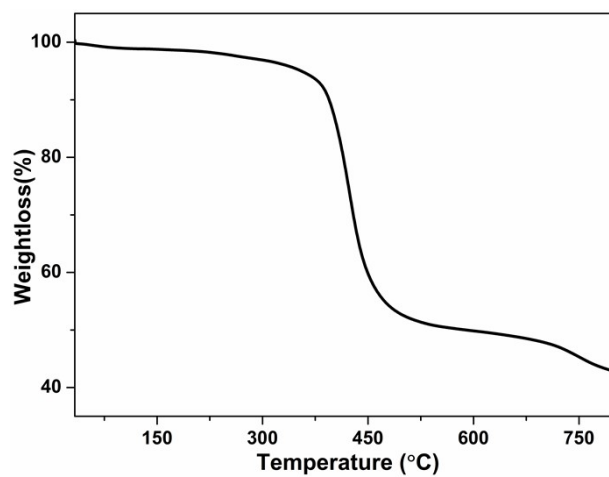

Fig. S3 The thermal analysis curve of compound 1.

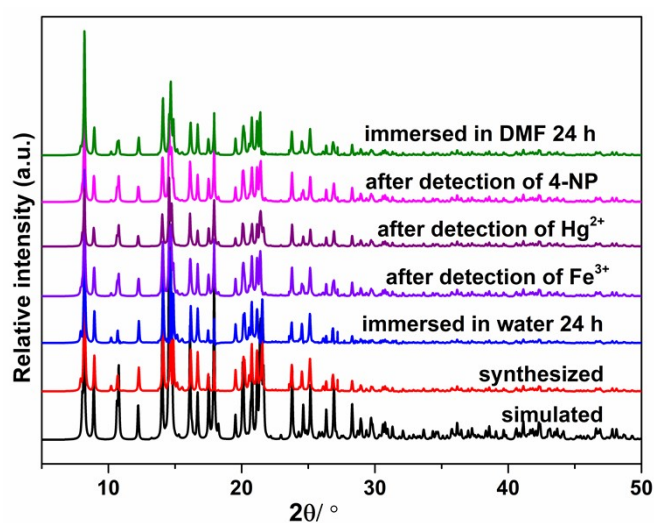

Fig. S4 PXRD pattern of compound 1, the immersed sample and the detection of Fe<sup>3+</sup>, Hg<sup>2+</sup> and 4-NP.

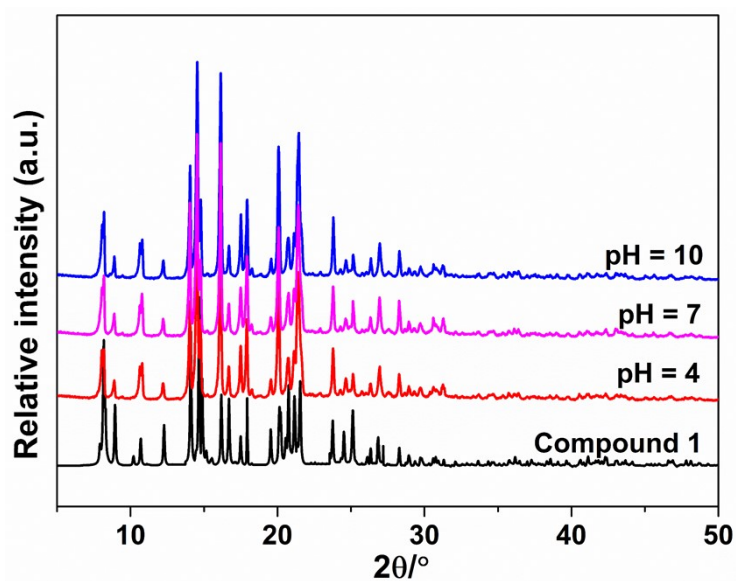

Fig. S5 The PXRD pattern of 1 after being soaked in acidic and basic solutions.

### Section 3 Detection of $\text{Fe}^{3+}$ and $\text{Hg}^{2+}$

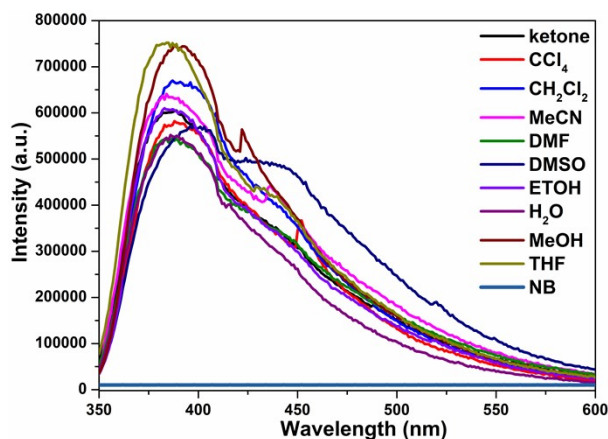

**Fig. S6** Luminescent spectra of **1** ( $\lambda_{\text{ex}}$ : 320 nm) in different solvents (Condition: 5 mg **1**, 3 mL solvent).

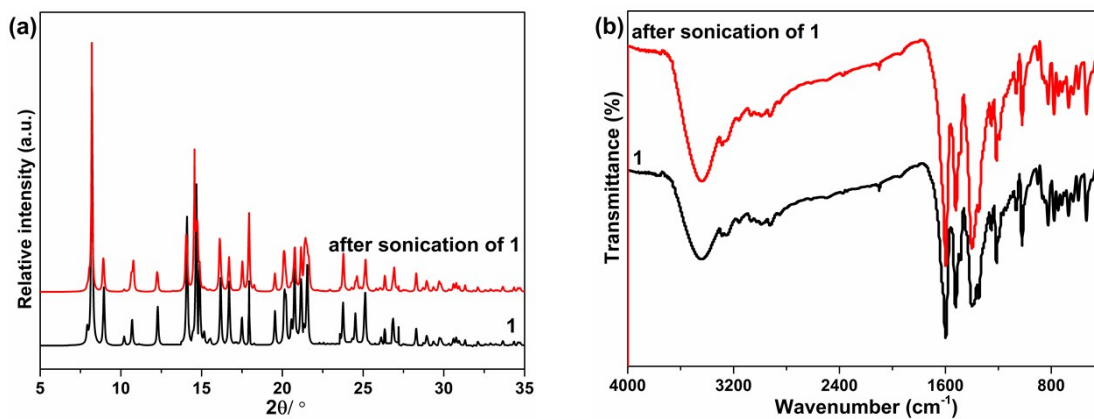

**Fig. S7** PXRD pattern and IR spectra of compound **1** before and after sonication in water.

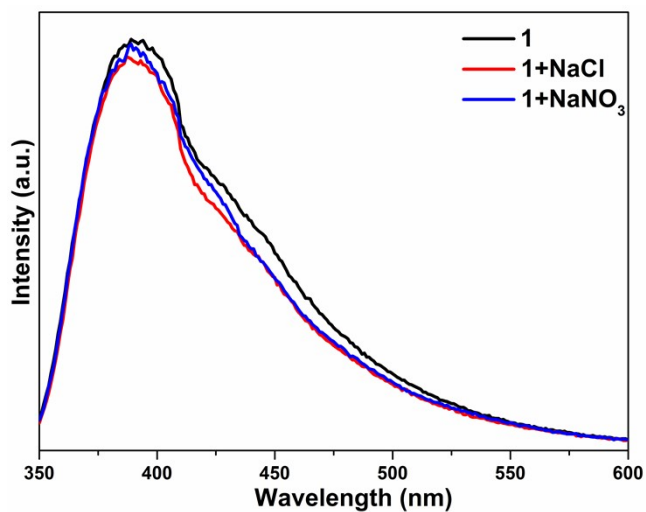

**Fig. S8** The emission spectra of **1** immersed in water solution of NaCl and  $\text{NaNO}_3$ , respectively (Condition: 5 mg **1**, 3 mL  $\text{H}_2\text{O}$  and 0.02 mmol  $\text{Na}^+$  ion).

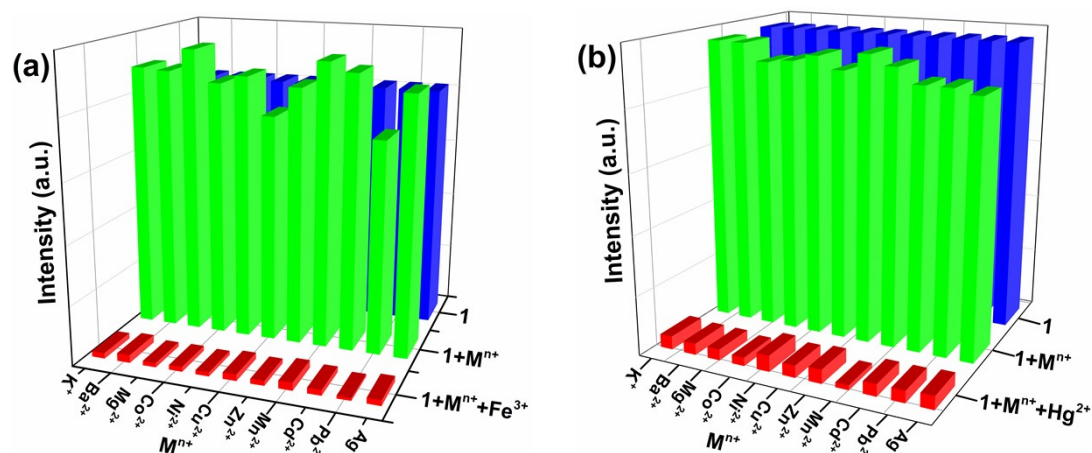

**Fig. S9** The competition experiments of **1** for detection of (a)  $\text{Fe}^{3+}$  and (b)  $\text{Hg}^{2+}$  ions in the presence of the interfering metal cations (Condition: 5 mg MOF, 3 mL  $\text{H}_2\text{O}$ , 10  $\mu\text{L}$   $\text{M}^{n+}$  ions (0.1 M) and 10  $\mu\text{L}$   $\text{Fe}^{3+}$  ( $\text{Hg}^{2+}$ ) (0.01 M)).

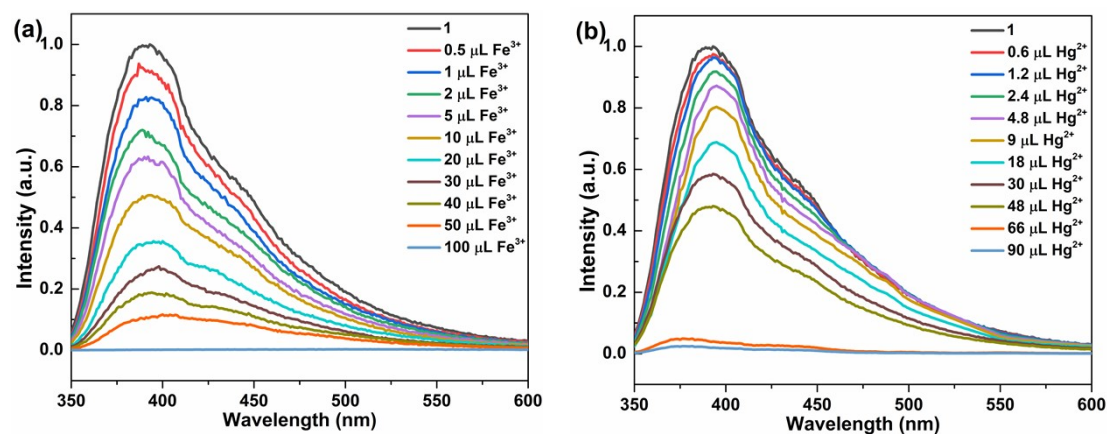

**Fig. S10** Fluorescent spectra of **1** suspension (1.67 mg/mL) upon incremental addition of (a)  $\text{Fe}^{3+}$  and (b)  $\text{Hg}^{2+}$  (0.01 M).

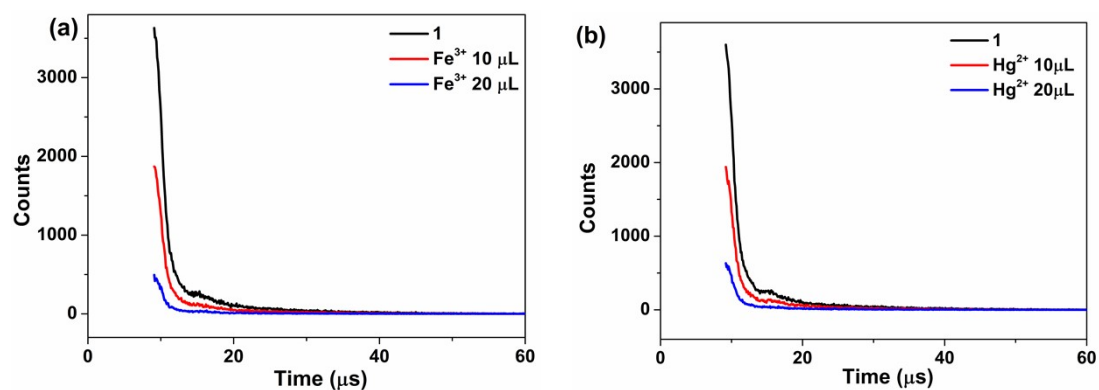

**Fig. S11** The fluorescence decay curves of **1** in  $\text{Fe}^{3+}$  (a) and  $\text{Hg}^{2+}$  (b) solution (0.01 M).

**Table S3** Average fluorescence lifetime ( $\langle\tau\rangle$ ) values of **1** before and after addition of  $\text{Fe}^{3+}$  and  $\text{Hg}^{2+}$ , respectively

|                                     | $a_1$ | $a_2$ | $\tau_1$ ( $\mu\text{s}$ ) | $\tau_2$ ( $\mu\text{s}$ ) | $\langle\tau\rangle$ ( $\mu\text{s}$ ) | $\chi^2$ |
|-------------------------------------|-------|-------|----------------------------|----------------------------|----------------------------------------|----------|
| Volume of $\text{Fe}^{3+}$ solution |       |       |                            |                            |                                        |          |
| added ( $\mu\text{L}$ , 0.01 M)     |       |       |                            |                            |                                        |          |
| 0                                   | 4.23  | 0.37  | 1.08                       | 9.15                       | 4.51                                   | 1.17     |
| 10                                  | 2.37  | 0.16  | 1.22                       | 9.56                       | 4.11                                   | 1.17     |
| 20                                  | 0.56  | 0.043 | 1.00                       | 8.47                       | 3.94                                   | 0.94     |
| Volume of $\text{Hg}^{2+}$ solution |       |       |                            |                            |                                        |          |
| added ( $\mu\text{L}$ , 0.01 M)     |       |       |                            |                            |                                        |          |
| 0                                   | 4.53  | 0.32  | 1.24                       | 9.95                       | 4.39                                   | 1.09     |
| 10                                  | 2.19  | 0.19  | 1.05                       | 8.00                       | 3.81                                   | 1.02     |
| 20                                  | 0.75  | 0.06  | 1.10                       | 8.83                       | 3.54                                   | 1.16     |

$$\langle\tau\rangle = (a_1\tau_1^2 + a_2\tau_2^2)/(a_1\tau_1 + a_2\tau_2)$$

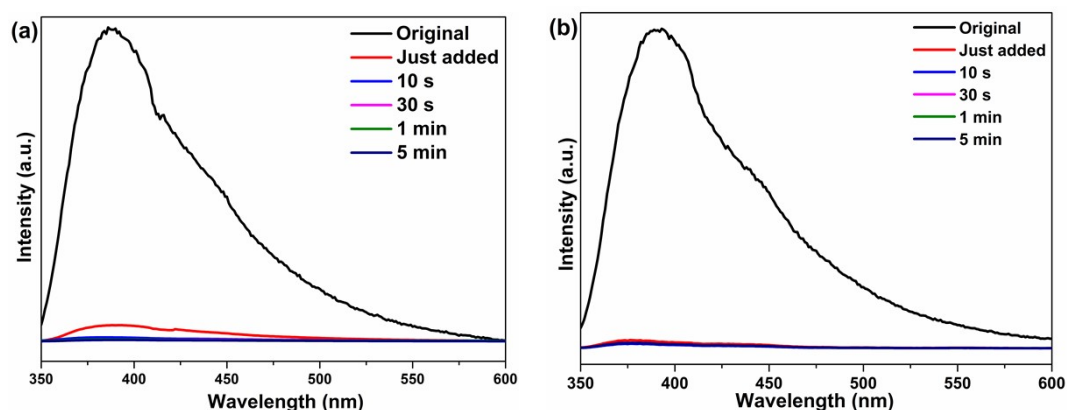

**Fig. S12** Time-dependent fluorescent quenching detections of **1** for  $\text{Fe}^{3+}$  (a) and  $\text{Hg}^{2+}$  (b) ions.

To calculate the standard deviation and detection limit of this detection method, 5 mg **1** was well ground and suspended in 3 mL  $\text{H}_2\text{O}$ . Then,  $\text{Fe}^{3+}$  ( $\text{Hg}^{2+}$ ) ion solution (0.01 M) was added into the suspension and the fluorescent intensities were recorded. Standard deviation ( $\sigma$ ) was calculated from five blank tests of **1** suspension and the detection limit was calculated via the formula:  $3\sigma/k$  ( $k$ : slope of the straight line).

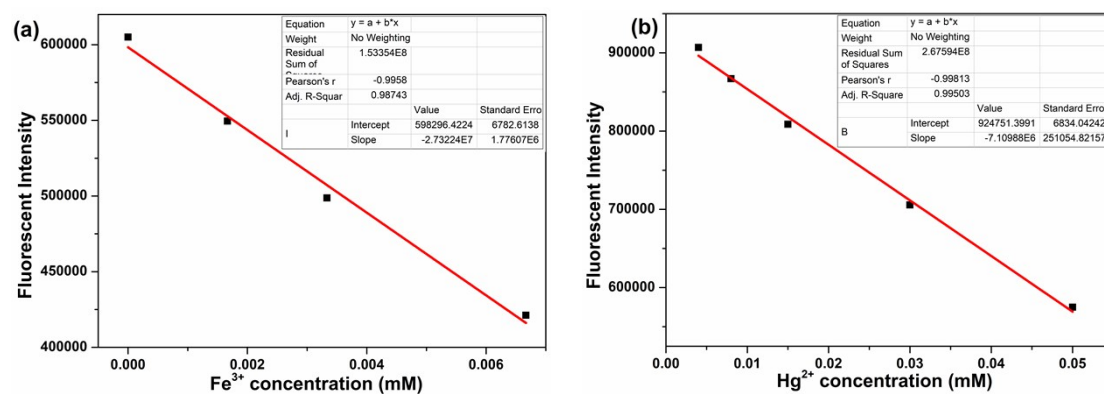

**Fig. S13** Linear curve of fluorescent intensity of **1** suspension upon incremental addition of (a)  $\text{Fe}^{3+}$  and (b)  $\text{Hg}^{2+}$ .

**Table S4** Standard deviation calculation

|                                    | Fluorescent intensity ( $\times 10^5$ ) |
|------------------------------------|-----------------------------------------|
| <b><math>\text{Fe}^{3+}</math></b> |                                         |
| Test 1                             | 6.050                                   |
| Test 2                             | 6.072                                   |
| Test 3                             | 6.045                                   |
| Test 4                             | 6.076                                   |
| Test 5                             | 6.035                                   |
| Standard deviation ( $\sigma$ )    | 0.0177                                  |
| <b><math>\text{Hg}^{2+}</math></b> |                                         |
| Test 1                             | 10.001                                  |
| Test 2                             | 9.988                                   |
| Test 3                             | 9.998                                   |
| Test 4                             | 9.979                                   |
| Test 5                             | 9.996                                   |
| Standard deviation ( $\sigma$ )    | 0.0089                                  |

**Table S5** Detection limit calculation for  $\text{Fe}^{3+}$  and  $\text{Hg}^{2+}$

|                                    |                                     |
|------------------------------------|-------------------------------------|
| <b>Compound 1</b>                  |                                     |
| <b><math>\text{Fe}^{3+}</math></b> |                                     |
| Slope (k)                          | $2.732 \times 10^7 \text{ mM}^{-1}$ |
| Detection limit ( $3\sigma/k$ )    | 0.000194 mM                         |
| <b><math>\text{Hg}^{2+}</math></b> |                                     |
| Slope (k)                          | $7.110 \times 10^6 \text{ mM}^{-1}$ |
| Detection limit ( $3\sigma/k$ )    | 0.000375 mM                         |

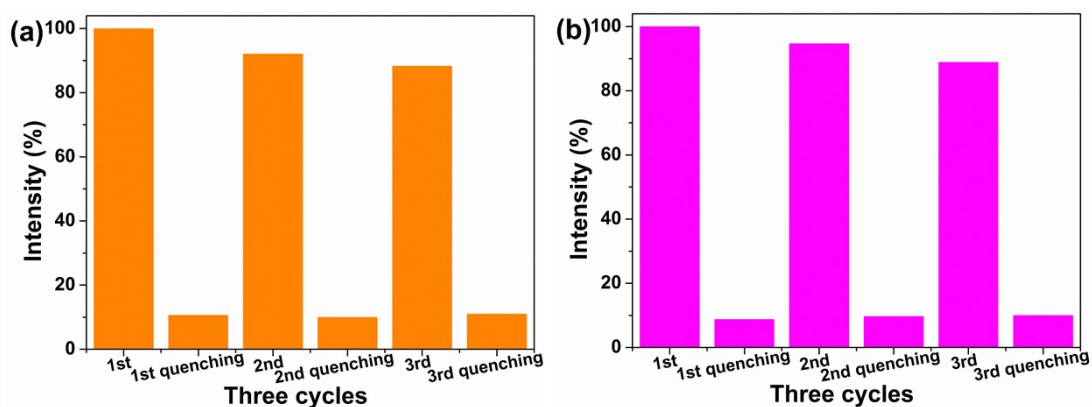

Fig. S14 Three quenching cycles of **1** suspension after addition of  $\text{Fe}^{3+}$  (a) and  $\text{Hg}^{2+}$  (b).

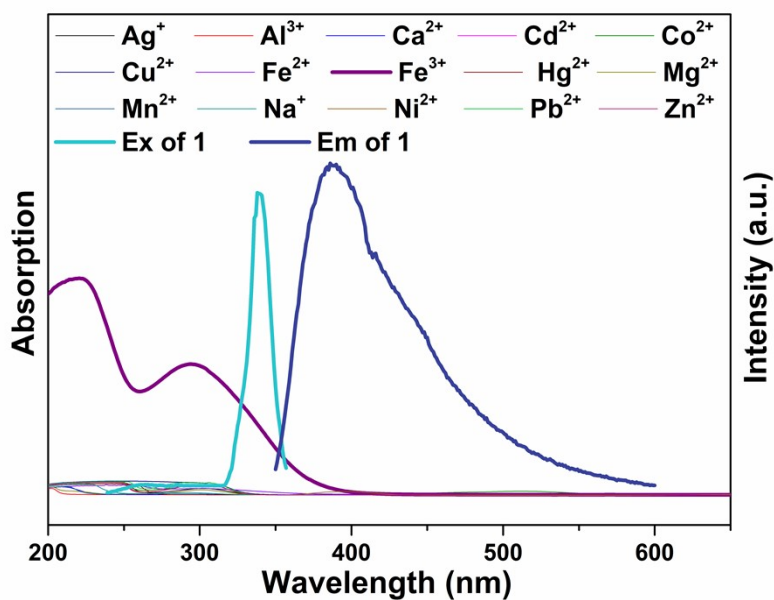

Fig. S15 UV-vis spectra of metal salts, the excitation and emission spectra of **1**, showing their overlapping.

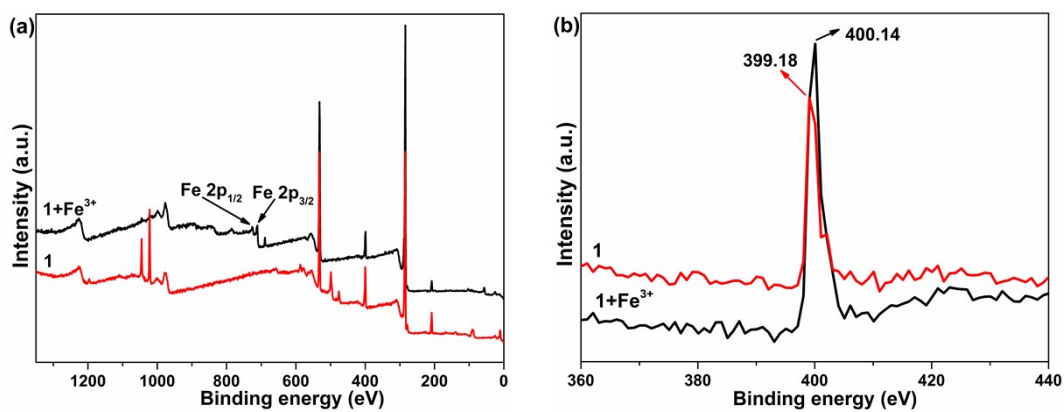

Fig. S16 (a) XPS for complex **1** and  $\text{Fe}^{3+}$  incorporating **1**; (b) N 1s XPS for **1** and  $\text{Fe}^{3+}$  incorporating **1**.

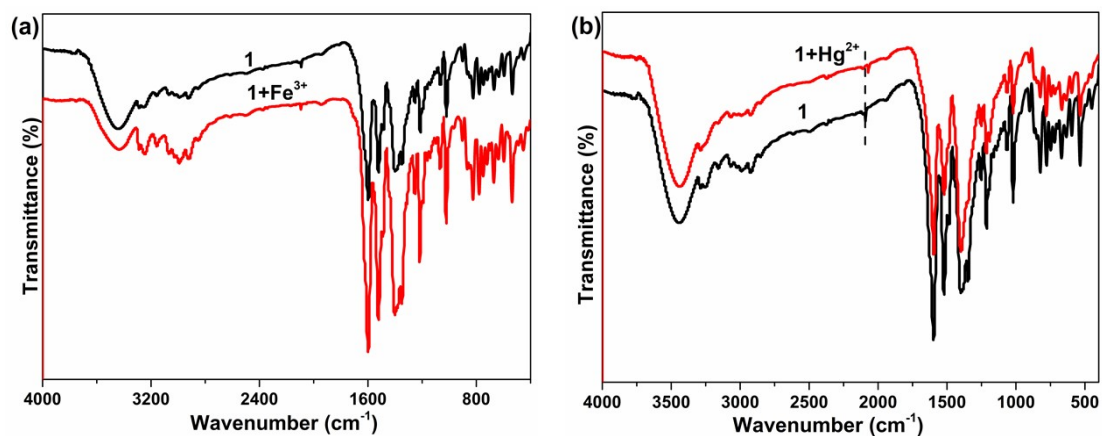

**Fig. S17** (a) FT-IR spectra for complex **1** and  $\text{Fe}^{3+}$  incorporated **1**; (b) FT-IR spectra for complex **1** and  $\text{Hg}^{2+}$  incorporated **1**.

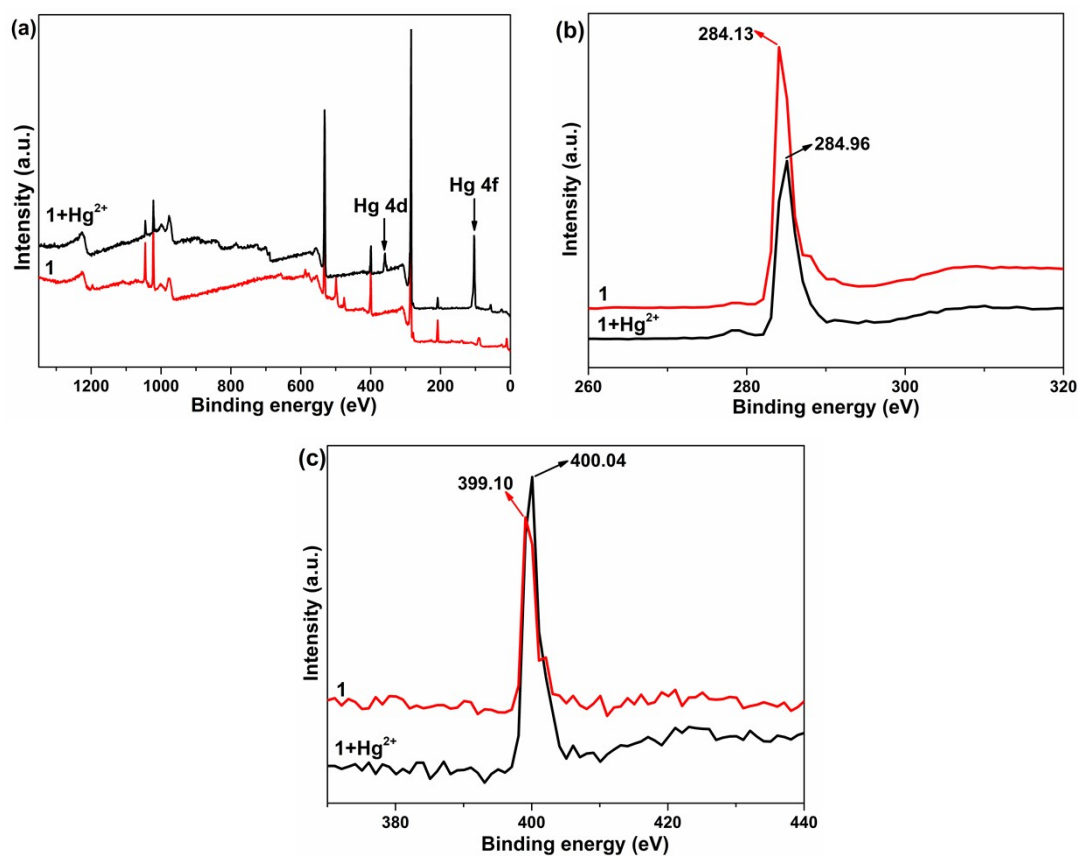

**Fig. S18** (a) XPS for complex **1** and  $\text{Fe}^{3+}$  incorporating **1**; (b) C 1s XPS for **1** and  $\text{Fe}^{3+}$  incorporating **1**; (c) N 1s XPS for **1** and  $\text{Fe}^{3+}$  incorporating **1**.

## Section 4 Detection of nitro explosives

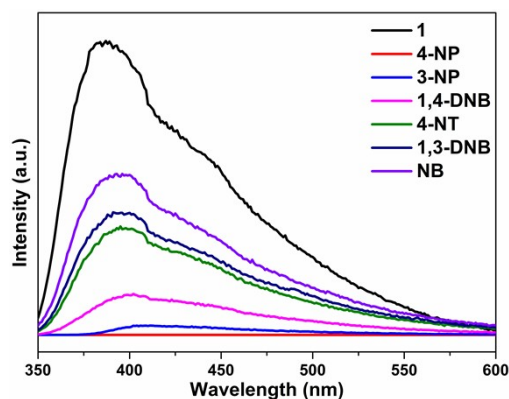

**Fig. S19** Luminescent spectra of **1** before and after detection of different nitro complexes at room temperature (Condition: 5 mg **1**, 3 mL DMF and 20  $\mu$ L analyte solvent (0.2 M)).

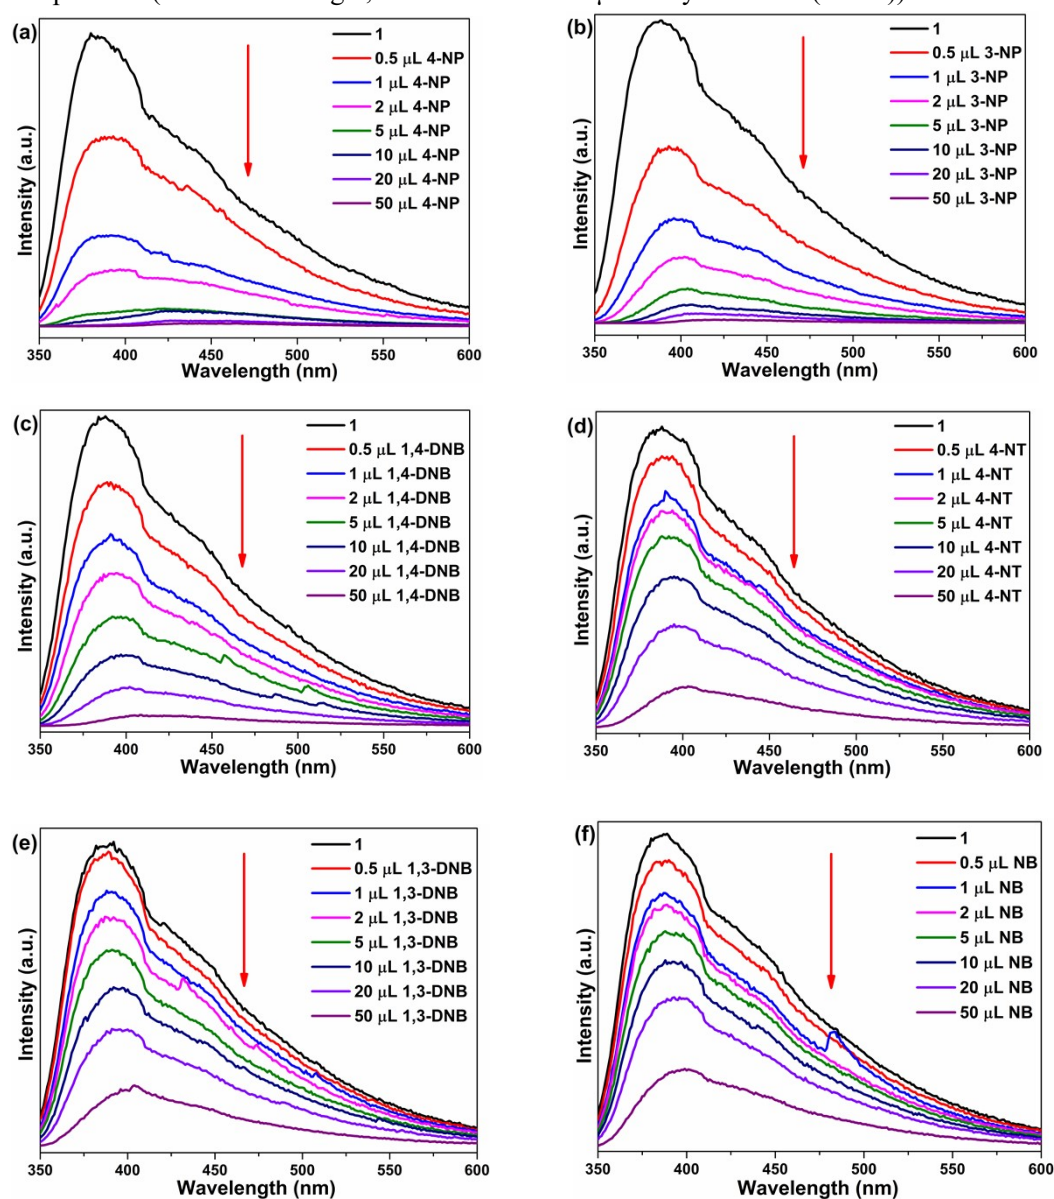

**Fig. S20** Fluorescent spectra of **1** suspension (1.67 mg/mL) upon incremental addition of nitro compounds (0.2 M).

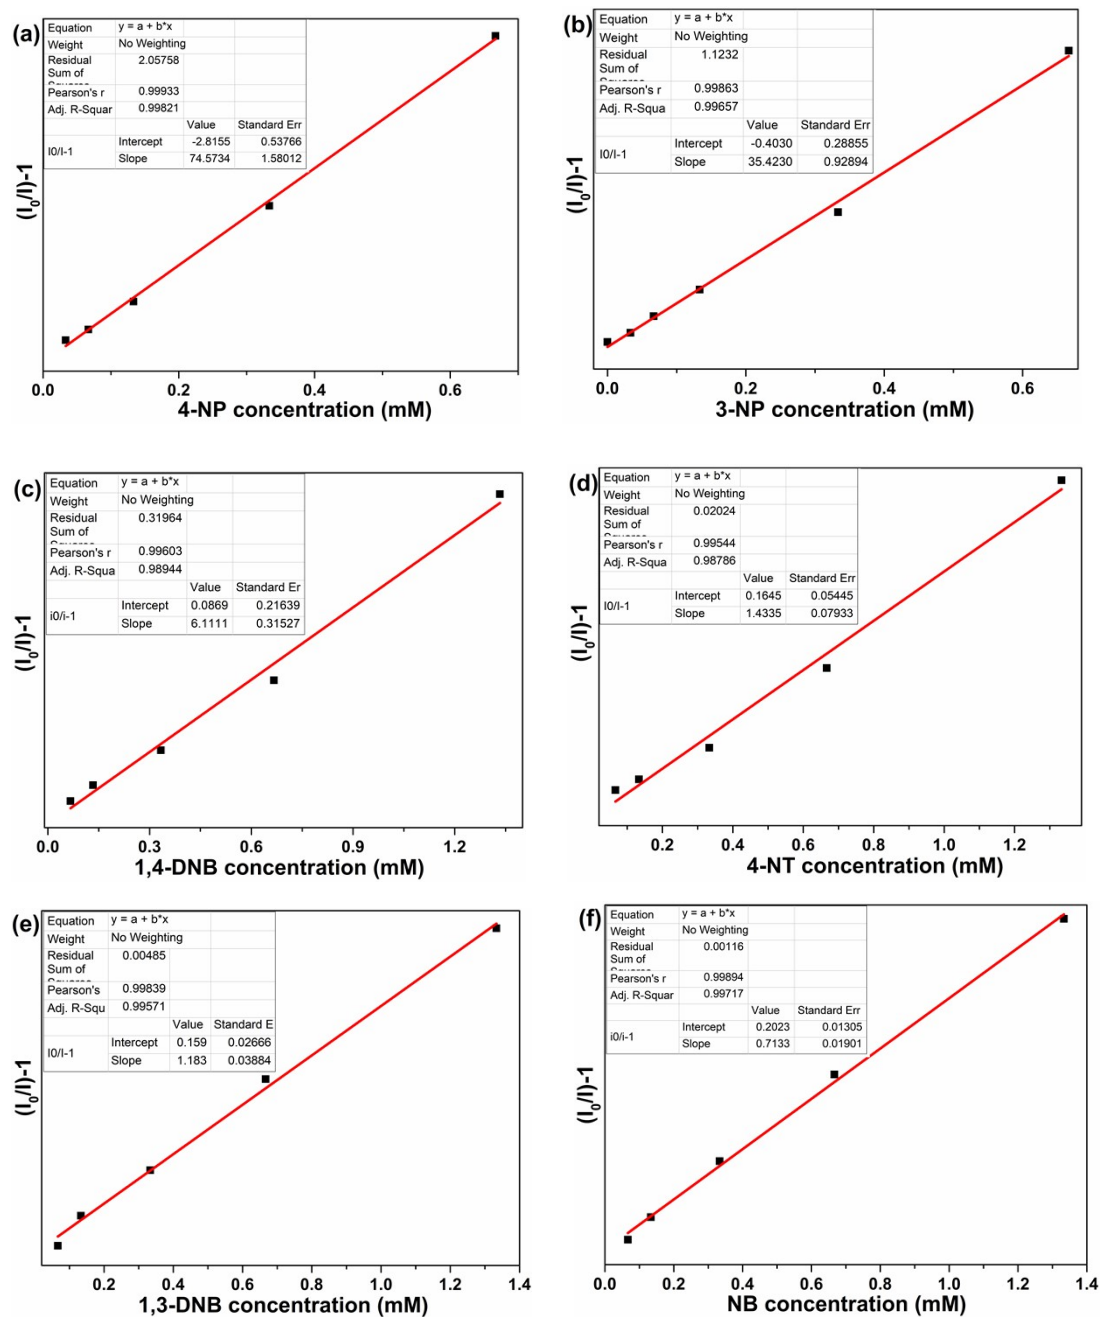

**Fig. S21** S-V plot of **1** suspended in DMF (1.67 mg/mL) upon incremental addition of nitro compounds (0.2 M).

**Table S6** Quenching effect coefficients ( $K_{sv}$ ) of nitro compounds effect on the luminescent intensity of molecule incorporated **1**.

| No. | Nitro compounds | $K_{sv}$ (M <sup>-1</sup> ) |
|-----|-----------------|-----------------------------|
| 1   | 4-NP            | $7.46 \times 10^4$          |
| 2   | 3-NP            | $3.54 \times 10^4$          |
| 3   | 1,4-DNB         | $6.11 \times 10^3$          |
| 4   | 4-NT            | $1.43 \times 10^3$          |
| 5   | 1,3-DNB         | $1.18 \times 10^3$          |
| 6   | NB              | $0.71 \times 10^3$          |

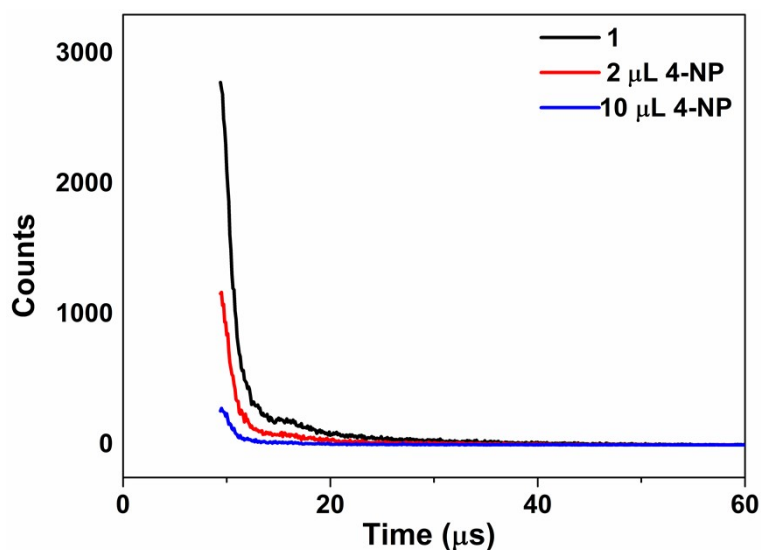

**Fig. S22** The fluorescence decay curves of **1** in 4-NP solution (0.2 M).

**Table S7** Average fluorescence lifetime ( $\langle\tau\rangle$ ) values of **1** before and after addition of 4-NP

| 4-NP ( $\mu\text{L}$ ) | $a_1$ | $a_2$ | $\tau_1$ ( $\mu\text{s}$ ) | $\tau_2$ ( $\mu\text{s}$ ) | $\langle\tau\rangle$ ( $\mu\text{s}$ ) | $\chi^2$ |
|------------------------|-------|-------|----------------------------|----------------------------|----------------------------------------|----------|
| 0                      | 3.64  | 0.28  | 1.17                       | 9.67                       | 4.47                                   | 1.14     |
| 2                      | 1.46  | 0.12  | 1.00                       | 8.46                       | 4.06                                   | 0.98     |
| 10                     | 0.34  | 0.03  | 1.19                       | 8.19                       | 3.83                                   | 1.06     |

$$\langle\tau\rangle = (a_1\tau_1^2 + a_2\tau_2^2)/(a_1\tau_1 + a_2\tau_2)$$

To calculate the standard deviation and detection limit of this detection method, 5 mg **1** was well ground and suspended in 3 mL DMF, respectively. Then, 4-NP solution (5 mM, 0.5-10  $\mu\text{L}$ ) was added into the suspension and the fluorescent intensities were recorded. Standard deviation ( $\sigma$ ) was calculated from five blank tests of **1** suspension, and the detection limit was calculated via the formula:  $3\sigma/k$  ( $k$ : slope of the straight line).

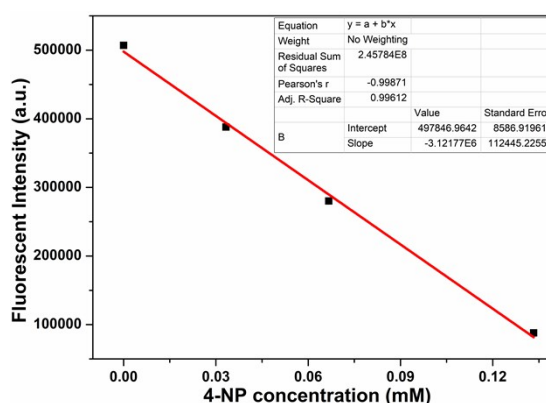

**Fig. S23** Linear curve of fluorescent intensity of **1** suspension upon incremental addition of 4-NP.

**Table S8** Standard deviation calculation for **1**

| Compound <b>1</b>               | Fluorescent intensity ( $\times 10^5$ ) |
|---------------------------------|-----------------------------------------|
| Test 1                          | 5.170                                   |
| Test 2                          | 5.165                                   |
| Test 3                          | 5.162                                   |
| Test 4                          | 5.173                                   |
| Test 5                          | 5.171                                   |
| Standard deviation ( $\sigma$ ) | 0.0045                                  |

**Table S9** Detection limit calculation of **1** for 4-NP

| Compound <b>1</b>               |                                     |
|---------------------------------|-------------------------------------|
| Slope (k)                       | $3.122 \times 10^6 \text{ mM}^{-1}$ |
| Detection limit ( $3\sigma/k$ ) | 0.000432 mM                         |

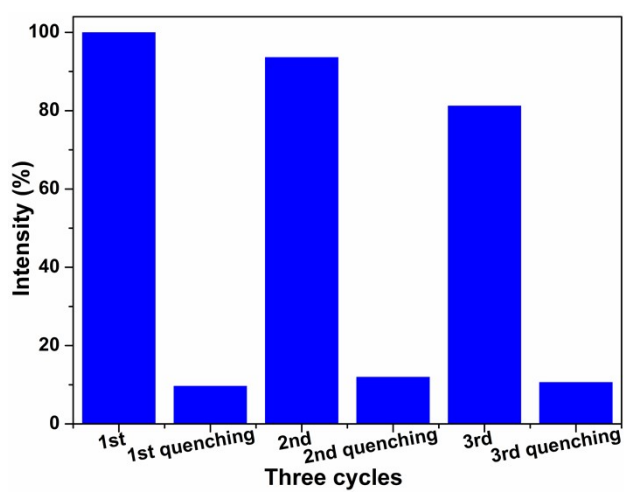**Fig. S24** Three quenching cycles of **1** suspension with the addition of 4-NP solution.
